# Supplementary material for: Implementation of a psychosocial support package for people receiving treatment for multidrug-resistant tuberculosis in Nepal: A feasibility and acceptability study
Source: PubMed Central journal article supplement (PMC6062069; doi:10.1371/journal.pone.0201163), 2018-07-26
Supplement: pone.0201163.s001.pdf [file pone.0201163.s001.pdf]

## ८. औषधि खान सम्झनको लागि बिरामीले के गर्नुपर्छ ?

- प्रत्येक दिन एउटै समयमा औषधि खाने गर्नुहोस् ।

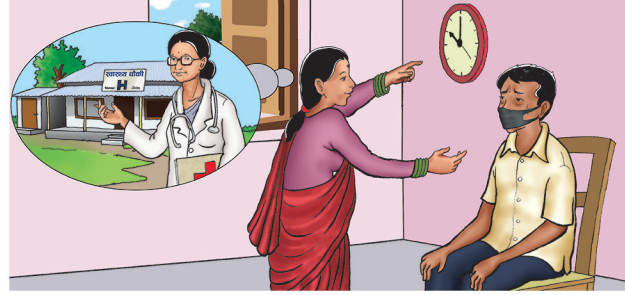

परिवारको कुनै सदस्य वा साथीलाई औषधि खान सम्झाउन आग्रह गर्नुहोस् ।

- औषधि खान सम्झनको लागि अलार्म राख्नुहोस् ।

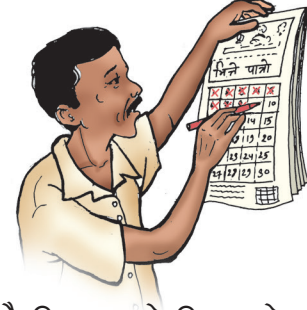

औषधि खाइसकेपछि क्यालेन्डरमा चिन्ह लगाउनुहोस् ।

नोट : यदि औषधिको कुनै मात्रा छुटेमा एकै दिनमा दोब्बर मात्रा (close) औषधि नखाउनुहोस् । साविक जस्तै औषधि लिइरहनुहोस् र छिटोभन्दा छिटो स्वास्थ्यकर्मीलाई यससम्बन्धि खबर गर्नुहोस् ।

## एम. डि. आर. टि. बी. विरामीमा पोषणको महत्त्व :

- स्वस्थ खाना खानुहोस् र पर्याप्त मात्रामा आराम गर्नुहोस् । दिनमा एकै पटकमा धेरै खानुभन्दा थोरैथोरै गरेर धेरै पटक खानुहोस् ।
- पखाला लागेमा बारम्बार बढी मात्रामा पानी र पुनर्जलीय भोल पिउनुहोस् ।

- मासु, र अण्डा मात्र भन्दा पनि स्थानिय स्तरमा सजिलै पाइने गेडागुडी, दाल, भटमासको सेवन गर्नुहोस् ।
- फलफूल र हरिया सागसब्जिहरु पनि लिने गर्नुहोस् ।
- सुई लगाएको अवधिभरि केरा र दही खानुहोस् ।

## १३. एम. डि. आर. टि. बी. विरामीले गर्नेपर्ने र गर्नहुने कुराहरु :

गर्ने पर्ने : • औषधि निश्चित समयमा नियमित खाने

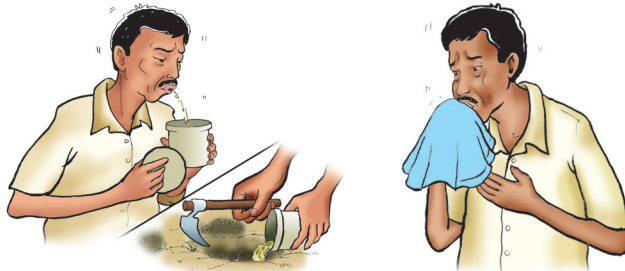

- खकार निश्चित ठाउँमा बिसर्जन गर्ने
- खोक्दा वा हाच्छर्नु गर्दा हरेक पल्ट मुख छोप्ने

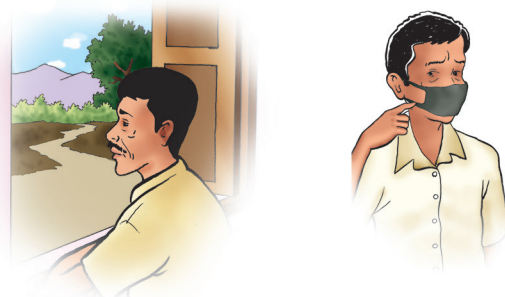

- हावा आवत-जावतको लागि भ्याल र ढोकाहरु खुला राख्ने
- मास्कको प्रयोग गर्ने

## गर्नेनहुने :

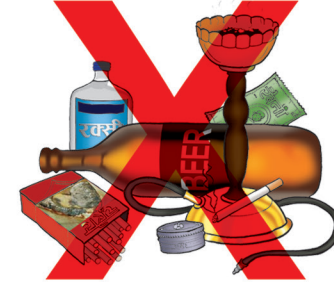

जाँडरक्सी, चुरोट र सुर्तीजन्य पदार्थ नखाने

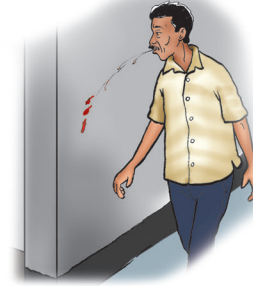

जहाँतही नथुक्ने

सकेसम्म अनावश्यक भीडभाडमा नजाने

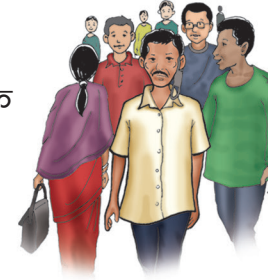

## याद राख्नुपर्ने कुराहरु :

- औषधि खाइसकेको केही महिनापछि विरामीले सन्धो भएको महसुस गर्न थाल्छन् र औषधि बन्द गर्न सक्छन् । तर यो अवस्थामा टि. बी. का सबै जीवाणुहरु मरिसकेका हुँदैनन् । यसबेला औषधि खान छाड्दा अझ गम्भीर किसिमको क्षयरोग हुनसक्छ । त्यसैले स्वास्थ्यकर्मीले निको भएको भन्नेसम्म औषधि खान नछोड्नुहोस् ।
- औषधि उपचारले राम्रो काम गरे नगरेको थाहा पाउन स्वास्थ्यकर्मीले भनेबमोजिम खकार जाँच गराउनुहोस् ।
- यदि कुनै अन्य रोगको औषधि खानुपर्ने भएमा क्षयरोगको औषधि खाइरहेको कुरा डाक्टरलाई बताउनुहोस् ।

एम. डि. आर. को उपचार स्वास्थ्य संस्थामा निःशुल्क छ । सेवा र सल्लाहको लागि नजिकको स्वास्थ्य संस्थामा सम्पर्क राख्नुहोस् ।

## सम्पर्क :

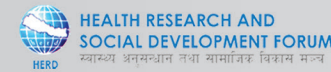

शापाथली, काठमाडौं

फोन नं. : ०१-४२३८०४५, ०१-४९०२०७२

# एम. डि. आर टि. बी. (MDR TB)

स्वास्थ्य जानकारी

एम. डि. आर. भएका व्यक्तिहरुका लागि

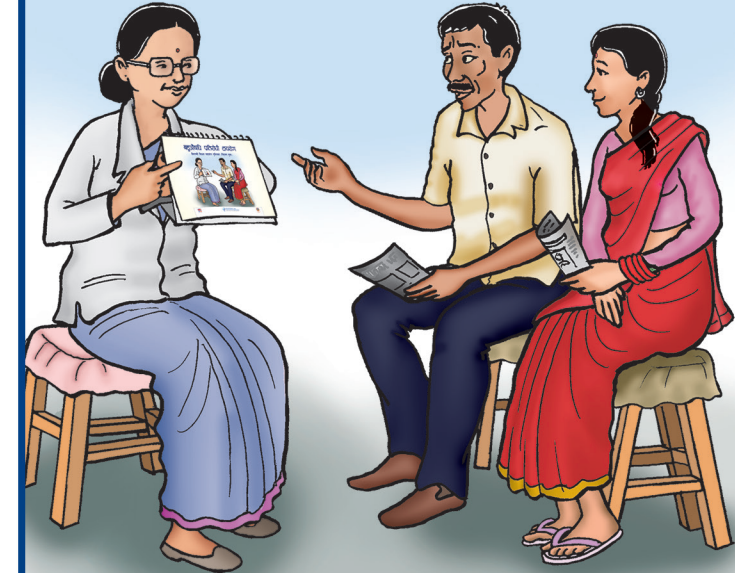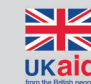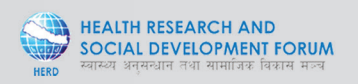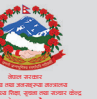

## १. टि. बी. भनेको के हो ?

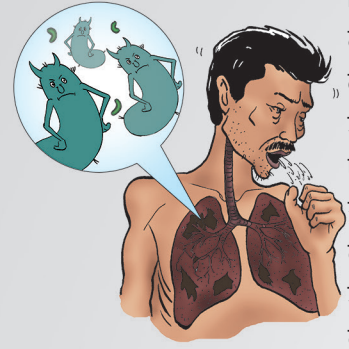

टि. बी. भनेको माईकोब्याक्टेरियम ट्युबरकुलोसिस नाम गरेको जीवाणुबाट लाग्ने छुटा सरुवा रोग हो । यो रोग क्षयरोग भएका व्यक्तिले खोक्दा या हाच्छुँ गर्दा हावाको माध्यमबाट एक व्यक्तिलाई अर्कोमा सर्छ ।

## २. एम. डि. आर. टि. बी भनेको के हो ?

एम. डि. आर. टि. बी. भनेको टि. बी. का २ वटा शक्तिशाली औषधिहरू आइसोनियाजाइड र रिफाम्पिसिन (Isoniazid and Rifampicin) ले पनि मार्न नसक्ने जीवाणुद्वारा लाग्ने रोग हो । यसमा विरामीलाई टि. बी. को औषधिले निको पार्न सक्दैन ।

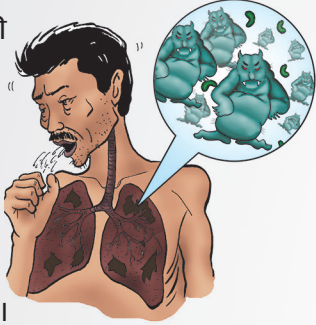

## ३. एम. डि. आर. टि. बी. कसरी हुन्छ ?

- स्वास्थ्यकर्मीले दिए अनुसारको टि. बी. को नियमित औषधि सेवन नगरेमा
- टि. बी. को उपचारको अवधि पूरा नगरेमा
- एम. डि. आर. टि. बी. भएका व्यक्तिले खोक्दा या हाच्छुँ गर्दा सीधै हावाको माध्यमबाट

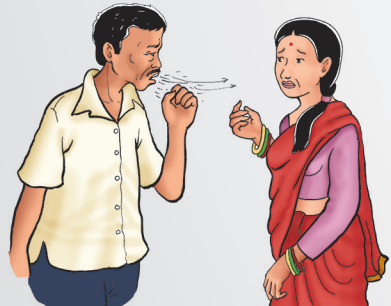

## ४. एम. डि. आर. टि. बी. का लक्षणहरू के के हुन् ?

साधारण टि.बी. को उपचार नियमित गर्दागर्दै पनि स्वास्थ्य अर्को खस्कँदै जानु वा निम्न लक्षणहरू देखा परिरहनु ।

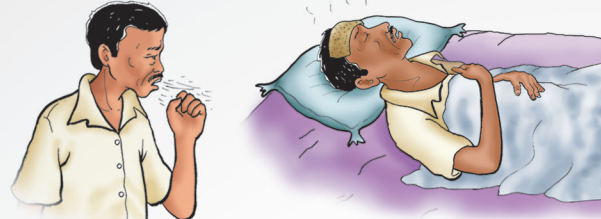

अ) खोकी लागिरहनु

आ) राति पसिना आउनु / ज्वरो आउनु

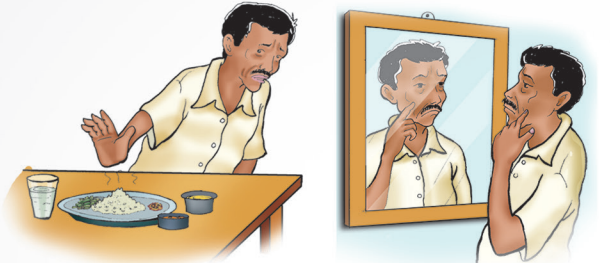

इ) खाना नरुच्नु

ई) तौल घट्दै जानु / थकाई लाग्नु

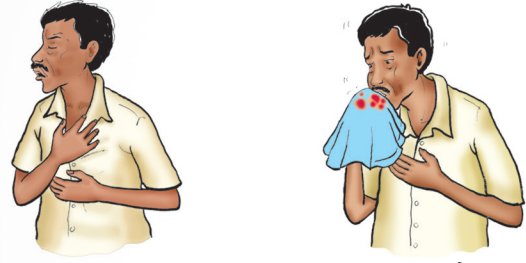

उ) छाती दुस्नु

ऊ) सकारमा रगतको छिटा देखिनु

यदि तपाईंले आफू या अरु कोही औषधि खाँदै गरेका साथीहरूमा यी लक्षणहरू भएको थाहा पाउनु भएमा तुरुन्त आफूले औषधि खाँदै गरेको स्वास्थ्य संस्थामा जानकारी गर्नुहोस् ।

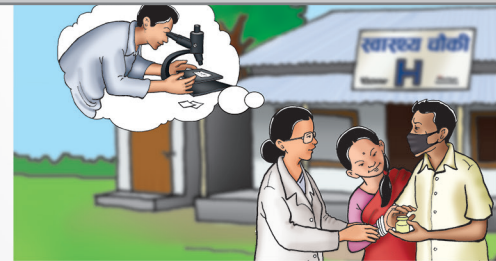

## ५. एम. डि. आर. टि. बी. को निदान कसरी हुन्छ ?

खकारको जाँच : अ) जिन एक्सपर्ट मेसिनबाट आ) कल्चर / डि. एस. टि. (Drug Susceptibility Test) बाट

## ६. एम. डि. आर. टि. बी. को बिरामीबाट कति समयसम्म अरुलाई यो रोग सर्ने सम्भावना रहन्छ ?

सामान्यतया औषधि खान शुरु गरेपछि अरुलाई सर्ने सम्भावना घट्दै जान्छ । जबसम्म खकार कल्चरको नतिजा नेगेटिभ आउँदैन त्यतिबेलासम्म यो रोग अरुलाई सर्ने सम्भावना रहन्छ । त्यो समय भनेको ४ देखि ६ महिना हुनसक्छ ।

- यदि तोकिए अनुसार नियमित औषधि खाएमा एम. डि. आर. टि. बी. को उपचार गर्न सकिन्छ र यो निको हुनसक्छ ।
- एम. डि. आर. टि. बी. को औषधि धेरै महँगो छ तर सरकारले निःशुल्क वितरण गरेको छ ।

## ७. टि. बी. र एम. डि. आर. टि. बी. उपचारबीचको भिन्नता :

| टि. बी.                                                                                                                                                                                                                  | एम. डि. आर. टि. बी.                                                                                                                                                                                    |
|--------------------------------------------------------------------------------------------------------------------------------------------------------------------------------------------------------------------------|--------------------------------------------------------------------------------------------------------------------------------------------------------------------------------------------------------|
| <ul style="list-style-type: none"> <li>• उपचार अवधि ६-८ महिना हुन्छ ।</li> <li>• थोरै औषधिहरू खानु पर्ने हुन्छ ।</li> <li>• औषधिका प्रतिकूल असरहरू कम हुन्छन् ।</li> </ul>                                               | <ul style="list-style-type: none"> <li>• उपचार अवधि २०-२४ महिना हुन्छ ।</li> <li>• धेरै औषधि र सुई लिनुपर्ने हुन्छ ।</li> <li>• औषधिका साधारणदेखी गम्भीर खालका प्रतिकूल असरहरू हुन सक्छन् ।</li> </ul> |
| <ul style="list-style-type: none"> <li>• टि. बी. र एम. डि. आर. टि. बी. दुबैको उपचार प्रत्यक्ष निगरानीमा हुनैपर्छ ।</li> <li>• यदि तोकिएका उपचार विधि अनुसार उपचार नभएमा वा नगरेमा रोग भन्नु गम्भीर हुन सक्छ ।</li> </ul> |                                                                                                                                                                                                        |

## ८. एम. डि. आर. टि. बी. औषधिहरूको प्रतिकूल असरहरू :

- तनाव/व्याकुलता
- मनमा अनावश्यक कुराहरू खेल्नु
- जोर्नीहरू दुस्ने
- छालामा विमिरा आउने / चिलाउने

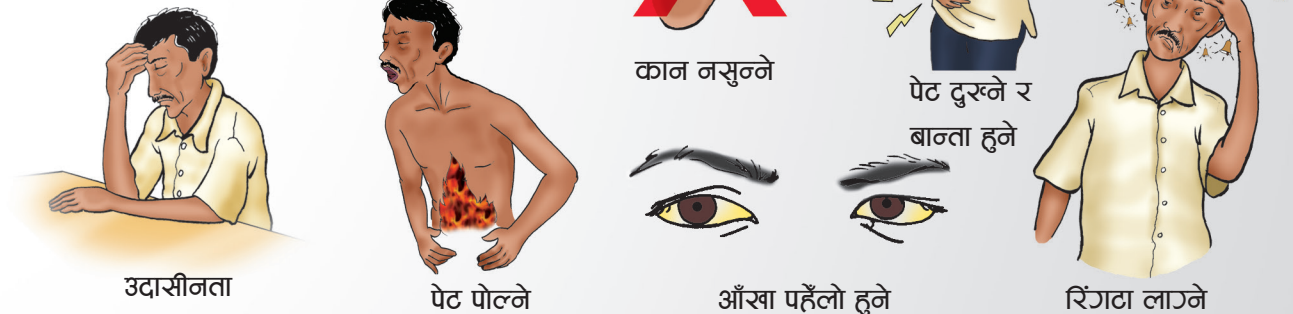

उदासीनता

पेट पोल्ने

कान नसुन्ने

आँखा पहेँलो हुने

पेट दुस्ने र बान्ता हुने

रिंगटा लाग्ने

नोट : यदि तपाईंले यस्ता लक्षणहरू महसुस गर्नुभएमा स्वास्थ्य संस्थामा खबर गर्नुहोस् । स्वास्थ्यकर्मीको सल्लाहबिना औषधि खान नछोड्नुहोस् ।
